# Supplementary material for: Essential role for Batf3-dependent dendritic cells in regulating CD8 T-cell response during SARS-CoV-2 infection
Source: PubMed Central journal article supplement (PMC10752548; doi:10.1371/journal.pone.0294176), 2023-12-27

S3 Fig

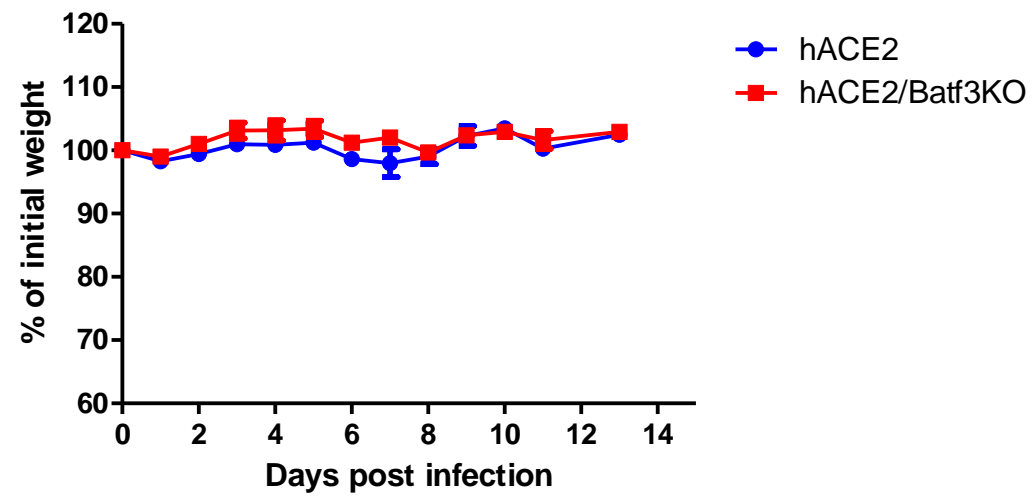

Supplement: pone.0294176.s003.pdf [file pone.0294176.s003.pdf]
